# Supplementary material
Source: PubMed Central journal article supplement (PMC4713996)
Supplement: 415_2015_7882_MOESM1_ESM.pdf [file 415_2015_7882_MOESM1_ESM.pdf]

Name: \_\_\_\_\_

Datum: \_\_\_\_\_

## Fragebogen für Impulskontrollstörungen bei der Parkinson-Krankheit – Bewertungsskala

### Auswertung

| Skala                | Erreichter Wert | Cut-Off-Wert | Klassifizierung                 |                                   |
|----------------------|-----------------|--------------|---------------------------------|-----------------------------------|
| A. Glücksspiel       | /16             | $\geq 3$     | <input type="radio"/> auffällig | <input type="radio"/> unauffällig |
| B. Sex               | /16             | $\geq 5$     | <input type="radio"/> auffällig | <input type="radio"/> unauffällig |
| C. Kaufen            | /16             | $\geq 5$     | <input type="radio"/> auffällig | <input type="radio"/> unauffällig |
| D. Essen             | /16             | $\geq 4$     | <input type="radio"/> auffällig | <input type="radio"/> unauffällig |
| E. Hobbyismus        | /16             | $\geq 4$     | <input type="radio"/> auffällig | <input type="radio"/> unauffällig |
| F. Punding           | /16             | $\geq 3$     | <input type="radio"/> auffällig | <input type="radio"/> unauffällig |
| G. DDS (Medikamente) | /16             | $\geq 3$     | <input type="radio"/> auffällig | <input type="radio"/> unauffällig |

**IKS Gesamtwert (A-D)** \_\_\_\_\_ (0-64)

**QUIP-RS Gesamtwert (A-G)** \_\_\_\_\_ (0-112)
